# Supplementary material
Source: PubMed Central journal article supplement (PMC2772562)
Supplement: supp_29_22_6018__1.pdf [file supp_29_22_6018__1.pdf]

## Supplemental Tables

**TABLE S1.** Probe and primer sequences for qRT-PCR analysis

| Gene name               | Gene symbol   | Probe <sup>a</sup>        | Primers <sup>b</sup>                                                |
|-------------------------|---------------|---------------------------|---------------------------------------------------------------------|
| TGF- $\beta$ 1          | <i>Tgfb1</i>  | AGTGGCTGAACCAAGGAGACGGAA  | <i>f</i> GACGTCACCTGGAGTTGTACGG<br><i>r</i> GCTGAATCGAAAGCCCTGT     |
| CTGF                    | <i>Ctgf</i>   | CCTGGGAAATGCTGCAAGGAGTGG  | <i>f</i> TTCCCGAGAAGGGTCAAGCT<br><i>r</i> TCCTTGGGCTCGTCACACA       |
| Fibronectin             | <i>Fnl</i>    | CCGACGAAGAGCCCTTACAGTTCCA | <i>f</i> ATCATTTTCATGCCAACCAAGTT<br><i>r</i> TCGCACTGGTGTAGAAGTTCCA |
| Collagen type I alpha 1 | <i>Col1a1</i> | TGCTGTGCTTTCTGCCCGGA      | <i>f</i> GTCCCAACCCCAAAGAC<br><i>r</i> CATCTTCTGAGTTTGGTGATACGT     |
| Collagen type III       | <i>Col3a1</i> | TCCCCTCTTATTTGGCACAGCAGTC | <i>f</i> TGGTTTCTTCTCACCCCTTCTTC<br><i>r</i> TGCATCCCAATTCATCTACGT  |
| 18S rRNA                | <i>Rn18s</i>  | ACCGGCACAAGACGGACCAG      | <i>f</i> GCCGCTAGAGGTGAAATCTTG<br><i>r</i> CATCTTGGCAAATGCTTTTCG    |

Sequences are listed 5' to 3'. <sup>a</sup>Probes were 5' end-labeled with FAM (reporter) and 3' end-labeled with TAMRA (quencher). <sup>b</sup>Forward primers are designated by f and reverse primers by r.

**TABLE S2.** The plasma and organ concentration of Y-27632 in wild-type and cGK I<sup>+/-</sup> mice

| Genotype             | n | Plasma<br>( $\mu$ mol/L) | Aorta<br>( $\mu$ mol/kg) | Heart<br>( $\mu$ mol/kg)     | Kidney<br>( $\mu$ mol/kg) | Lung<br>( $\mu$ mol/kg) |
|----------------------|---|--------------------------|--------------------------|------------------------------|---------------------------|-------------------------|
| WT                   | 3 | 0.81 $\pm$ 0.13          | 16.59 $\pm$ 6.97         | 4.93 $\pm$ 0.58              | 11.97 $\pm$ 0.08          | 11.61 $\pm$ 2.05        |
| cGK I <sup>+/-</sup> | 4 | 0.63 $\pm$ 0.14          | 14.96 $\pm$ 1.61         | 3.57 $\pm$ 0.36 <sup>a</sup> | 10.00 $\pm$ 1.41          | 7.77 $\pm$ 1.82         |

Values are means  $\pm$  SEM. <sup>a</sup>*P* = 0.0165 vs. WT mice.

**TABLE S3.** The hemodynamic profile of cGK I<sup>+/-</sup> mice

| Genotype and treatment         | n  | BW (g)                  | sBP (mmHg)                | mBP (mmHg)                | dBp (mmHg)                | HR (beats/min) |
|--------------------------------|----|-------------------------|---------------------------|---------------------------|---------------------------|----------------|
| WT                             | 4  | 31.4 ± 1.4              | 109.0 ± 2.5               | 77.1 ± 1.9                | 61.1 ± 1.7                | 554.0 ± 13.4   |
| WT + AII                       | 10 | 27.2 ± 0.5 <sup>a</sup> | 141.6 ± 6.7 <sup>a</sup>  | 101.9 ± 6.6 <sup>a</sup>  | 82.2 ± 6.8 <sup>a</sup>   | 522.3 ± 37.7   |
| WT + AII + Y                   | 5  | 27.3 ± 0.4 <sup>a</sup> | 145.1 ± 2.0 <sup>a</sup>  | 105.9 ± 3.8 <sup>a</sup>  | 86.4 ± 5.0 <sup>a</sup>   | 599.3 ± 63.9   |
| cGK I <sup>+/-</sup>           | 5  | 31.8 ± 1.5              | 108.0 ± 7.8               | 75.1 ± 4.5                | 58.7 ± 3.2                | 539.8 ± 36.5   |
| cGK I <sup>+/-</sup> + AII     | 10 | 27.4 ± 0.7 <sup>b</sup> | 162.4 ± 3.1 <sup>bc</sup> | 122.1 ± 4.1 <sup>bc</sup> | 101.6 ± 4.9 <sup>bc</sup> | 555.7 ± 42.4   |
| cGK I <sup>+/-</sup> + AII + Y | 6  | 27.7 ± 1.1 <sup>b</sup> | 163.8 ± 4.4 <sup>bc</sup> | 118.9 ± 2.0 <sup>bc</sup> | 97.2 ± 1.6 <sup>bc</sup>  | 540.5 ± 20.1   |

Values are means ± SEM. AII, angiotensin II; Y, Y-27632; BW, body weight; sBP, systolic blood pressure; mBP, mean blood pressure; dBp, diastolic blood pressure; HR, heart rate. <sup>a</sup>*P* < 0.01 vs. WT mice. <sup>b</sup>*P* < 0.01 vs. cGK I<sup>+/-</sup> mice. <sup>c</sup>*P* < 0.01 vs. WT mice with AII infusion.

**TABLE S4.** The hemodynamic profile of RhoA-Tg and BNP-Tg mice

| Genotype                     | n  | BW (g)     | sBP (mmHg)              | mBP (mmHg)              | dBp (mmHg)              | HR (beats/min)            |
|------------------------------|----|------------|-------------------------|-------------------------|-------------------------|---------------------------|
| NTg                          | 5  | 25.3 ± 0.4 | 119.8 ± 1.9             | 91.6 ± 2.1              | 77.8 ± 2.6              | 637.4 ± 23.3              |
| RhoA <sup>WT</sup> -Tg       | 8  | 25.4 ± 0.7 | 117.2 ± 5.7             | 88.5 ± 4.0              | 74.3 ± 3.4              | 601.4 ± 26.4              |
| RhoA <sup>A188</sup> -Tg     | 7  | 23.9 ± 1.6 | 120.3 ± 3.7             | 91.5 ± 2.3              | 77.1 ± 1.8              | 645.7 ± 22.3              |
| BNP-Tg                       | 11 | 25.8 ± 0.8 | 94.7 ± 2.3 <sup>a</sup> | 71.9 ± 1.8 <sup>a</sup> | 60.3 ± 1.7 <sup>a</sup> | 544.0 ± 28.1 <sup>a</sup> |
| RhoA <sup>WT</sup> /BNP-Tg   | 5  | 25.1 ± 0.8 | 99.5 ± 2.0 <sup>b</sup> | 69.4 ± 1.7 <sup>b</sup> | 54.2 ± 1.7 <sup>b</sup> | 527.8 ± 13.9              |
| RhoA <sup>A188</sup> /BNP-Tg | 5  | 25.0 ± 0.9 | 88.2 ± 3.1 <sup>c</sup> | 66.5 ± 1.5 <sup>c</sup> | 55.6 ± 1.5 <sup>c</sup> | 523.6 ± 51.8 <sup>c</sup> |

Values are means ± SEM. Abbreviations are as depicted in the footnote for Table S3. <sup>a</sup>*P* < 0.05 vs. NTg. <sup>b</sup>*P* < 0.05 vs. RhoA<sup>WT</sup>-Tg. <sup>c</sup>*P* < 0.01 vs. RhoA<sup>A188</sup>-Tg.

### Supplemental figure legends

**Supplemental FIG. S1.** Effect of cGK I hemizyosity on the myocardial interstitial fibrosis. Representative images (A) and the quantification (B) of Sirius Red-stained heart sections from cGK I<sup>+/-</sup> and WT mice untreated or treated with Ang II and Y-27632. Scale bar in (A), 0.1 mm. #,  $P < 0.001$ . Values are means  $\pm$  SEM of 5 to 46 replicates.

**Supplemental FIG. S2.** The transgene expression is confined to arterial media in RhoA-Tg mouse hearts. Immunostaining with anti-myc tag antibody of the heart section from RhoA<sup>A188</sup>-Tg mice. a, artery. v, vein. Scale bar, 50  $\mu$ m.

**Supplemental FIG. S3.** The transgene expression and activity in the MASMCS derived from RhoA-Tg mice. (A) Immunoblotting analysis of the MASMCS whole cell lysates with anti-RhoA antibody (upper left). Densitometric quantification of the endogenous RhoA protein abundance (lower left), the myc-RhoA protein abundance (upper right), and the myc-RhoA/endogenous RhoA ratio (lower right). Values are means  $\pm$  SEM of triplicates. (B) MASMCS were untreated (Pre) or treated (Post) for 5 minutes with thrombin (1 U/ml), the well established RhoA agonist, and subjected to cellular fractionation. Left panel; the protein level of endogenous RhoA and myc-RhoA in the membrane and cytosolic fractions was determined by immunoblotting analysis. Right panel; densitometric quantification of RhoA protein abundance in the membrane fraction of thrombin-stimulated cells. Values represent means of duplicates.

**Supplemental FIG. S4.** Transgenic expression of A188 RhoA causes exaggerated activation of ROCK, unresponsiveness to BNP, and increased Ser188 phosphorylation of endogenous RhoA. (A) Immunoblot showing the P-moesin and moesin level in the aortas of NTg and RhoA<sup>A188</sup>-Tg mice untreated or treated with Ang II. (B, C) Immunoblot analysis of the aortas of NTg, RhoA<sup>wt</sup>-Tg, RhoA<sup>A188</sup>-Tg, BNP-Tg, RhoA<sup>wt</sup>/BNP-Tg and RhoA<sup>A188</sup>/BNP-Tg mice. (B) The level of P-moesin and moesin. (C) The level of P-RhoA and RhoA. (D) Immunoblot showing the level of P-VASP Ser237, P-RhoA, cGK I and ROCK in the aortas of RhoA<sup>wt</sup>-Tg and RhoA<sup>A188</sup>-Tg mice. Values are means  $\pm$  SEM of 3 to 6 replicates (A) or triplicates (B-D). \*,  $P < 0.05$ .

**Supplemental FIG. S5.** Impact of BNP and ROCK on Ang II-induced effects in RhoA-Tg/BNP-Tg-background mouse tissues. (A) The relative ROCK activity of the aortas from the indicated mouse groups untreated or treated with Ang II was determined as P-moesin/moesin ratio by immunoblotting analysis. (B) Quantitative RT-PCR analysis of pro-fibrotic gene mRNA expression in the hearts of the RhoA-Tg/BNP-Tg-background NTg mice untreated or treated with Ang II and Y-27632. Values are means  $\pm$  SEM of 3 to 4 replicates. \*,  $P < 0.05$ .

**Supplemental FIG. S6.** Unresponsiveness of RhoA<sup>A188</sup>-Tg MASMCS to the cGMP-mediated inhibition of LPA-induced actin polymerization. (A, B) Verification of the integrity of MASMCS preparation by immunofluorescence of smooth muscle alpha-actin (A) and myc-tag (B). Nuclear staining was conducted with Hoechst 33258. (C) Phalloidin staining to visualize F-actin of serum-starved MASMCS without or with 2-hr pretreatment with 8-Br cGMP (0.5 mM) and 15-min stimulation with LPA (10  $\mu$ M). Scale bar, 25  $\mu$ m.

**A**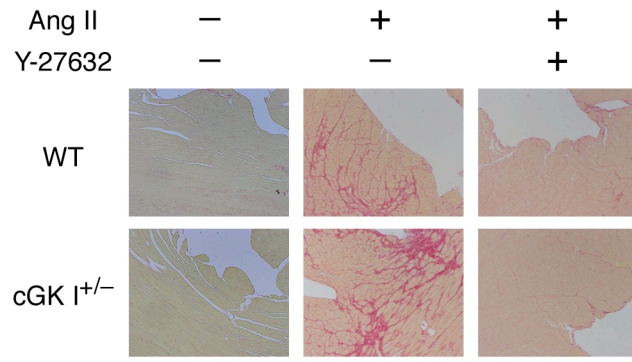**B**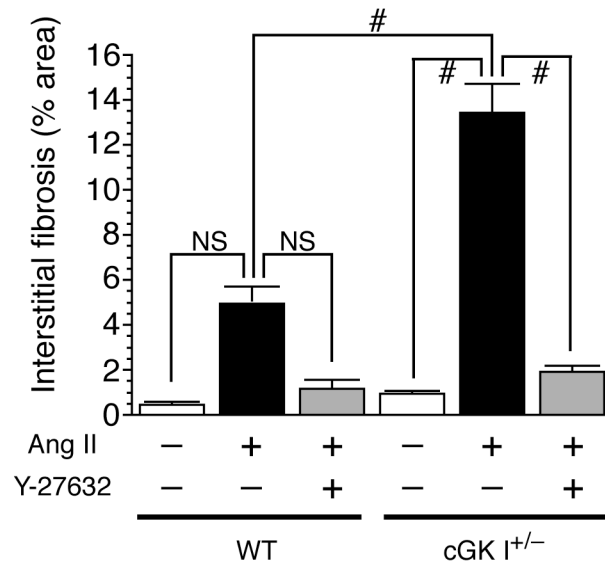**Figure S1**

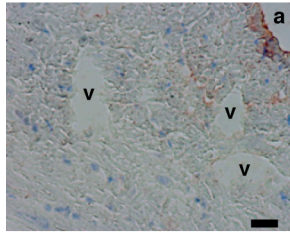

**Figure S2**

**A**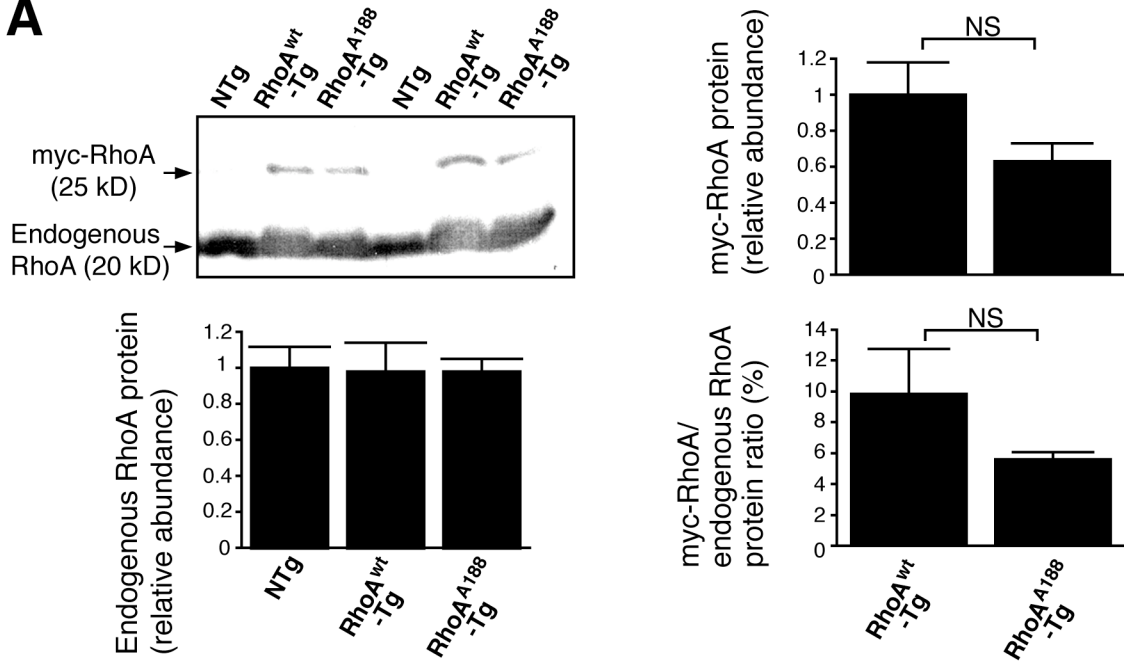**B**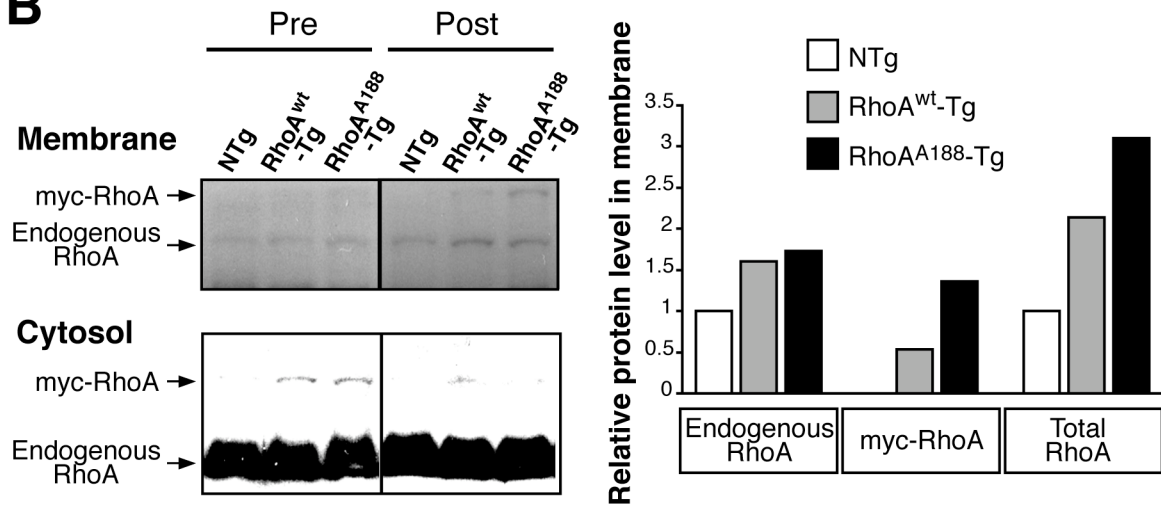**Figure S3**

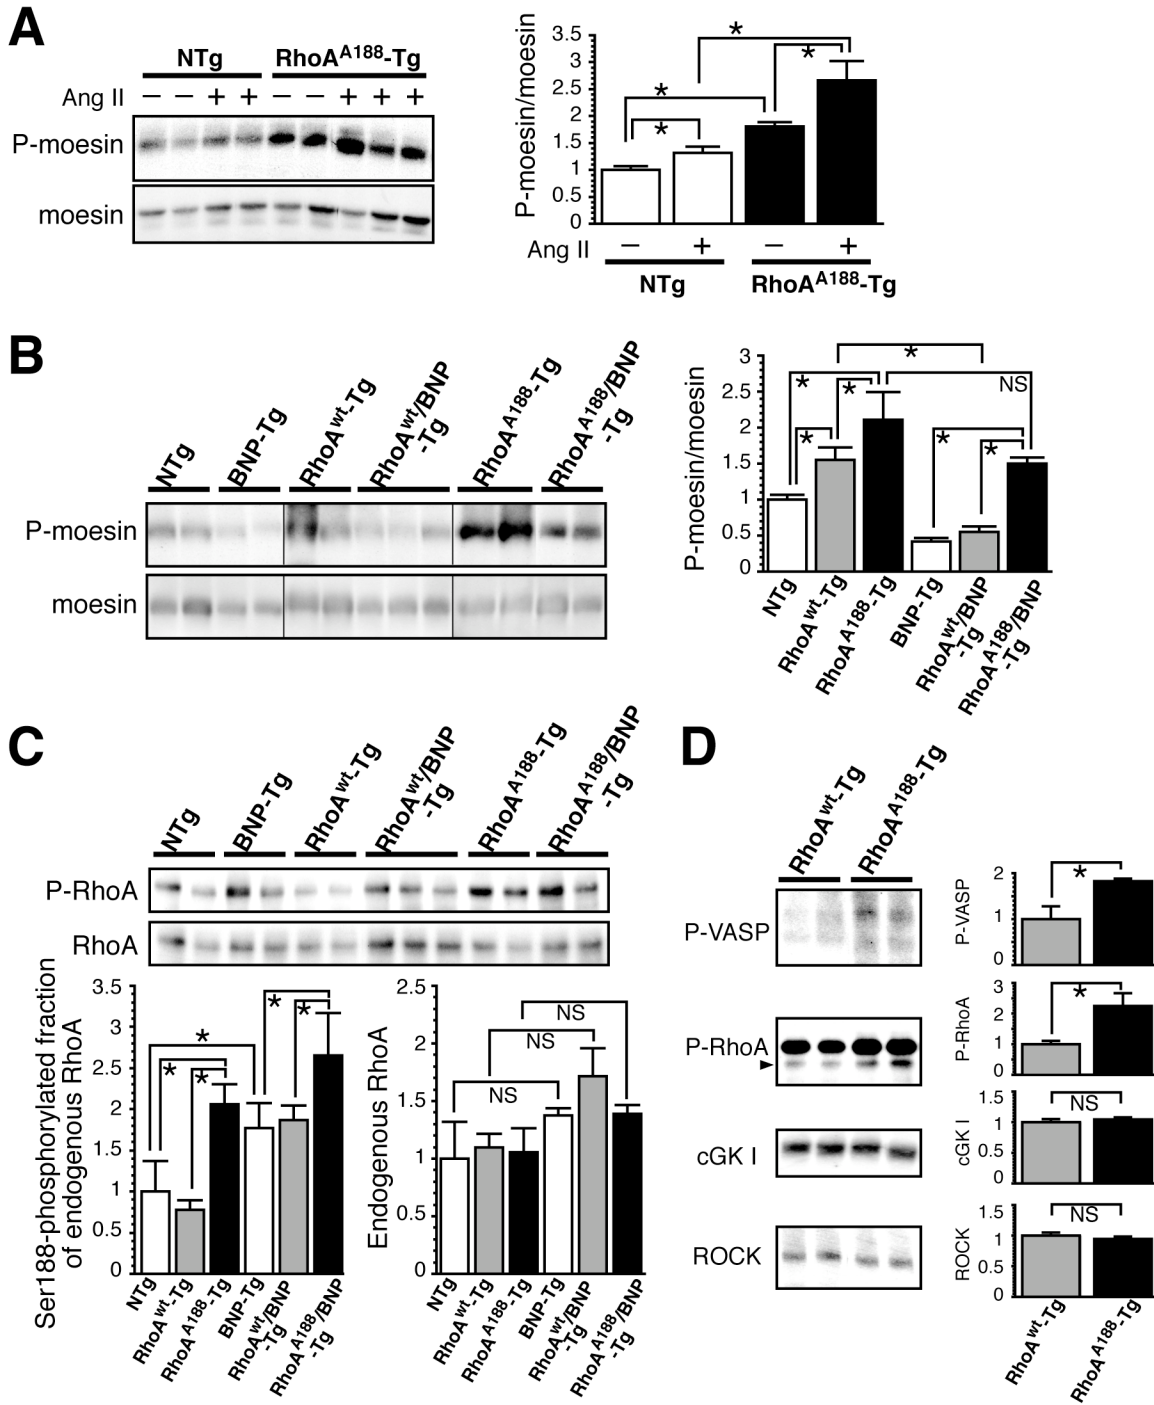

**Figure S4**



**A**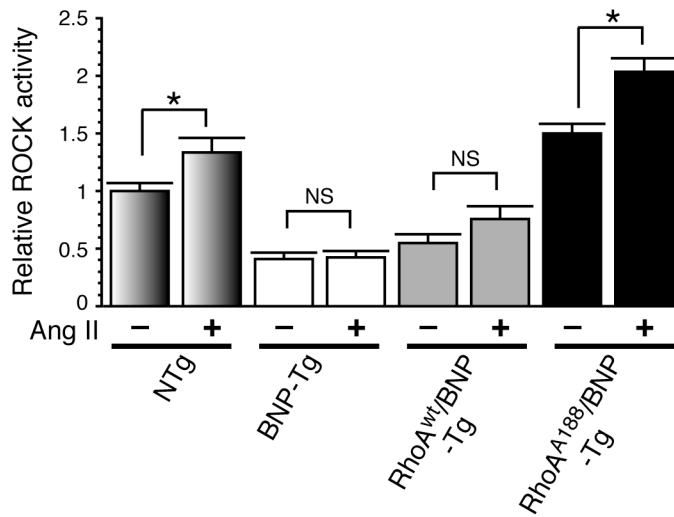**B**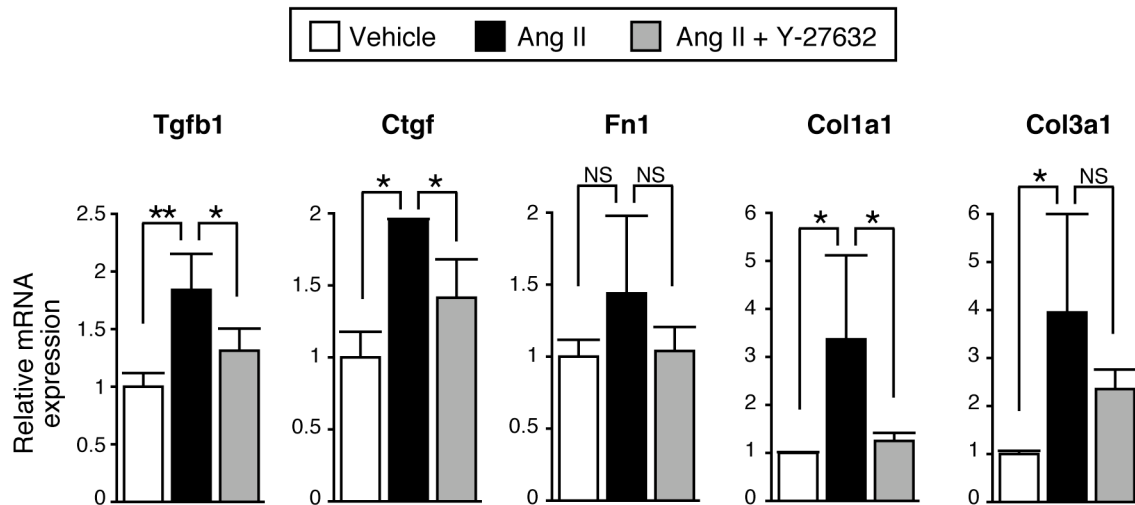**Figure S5**

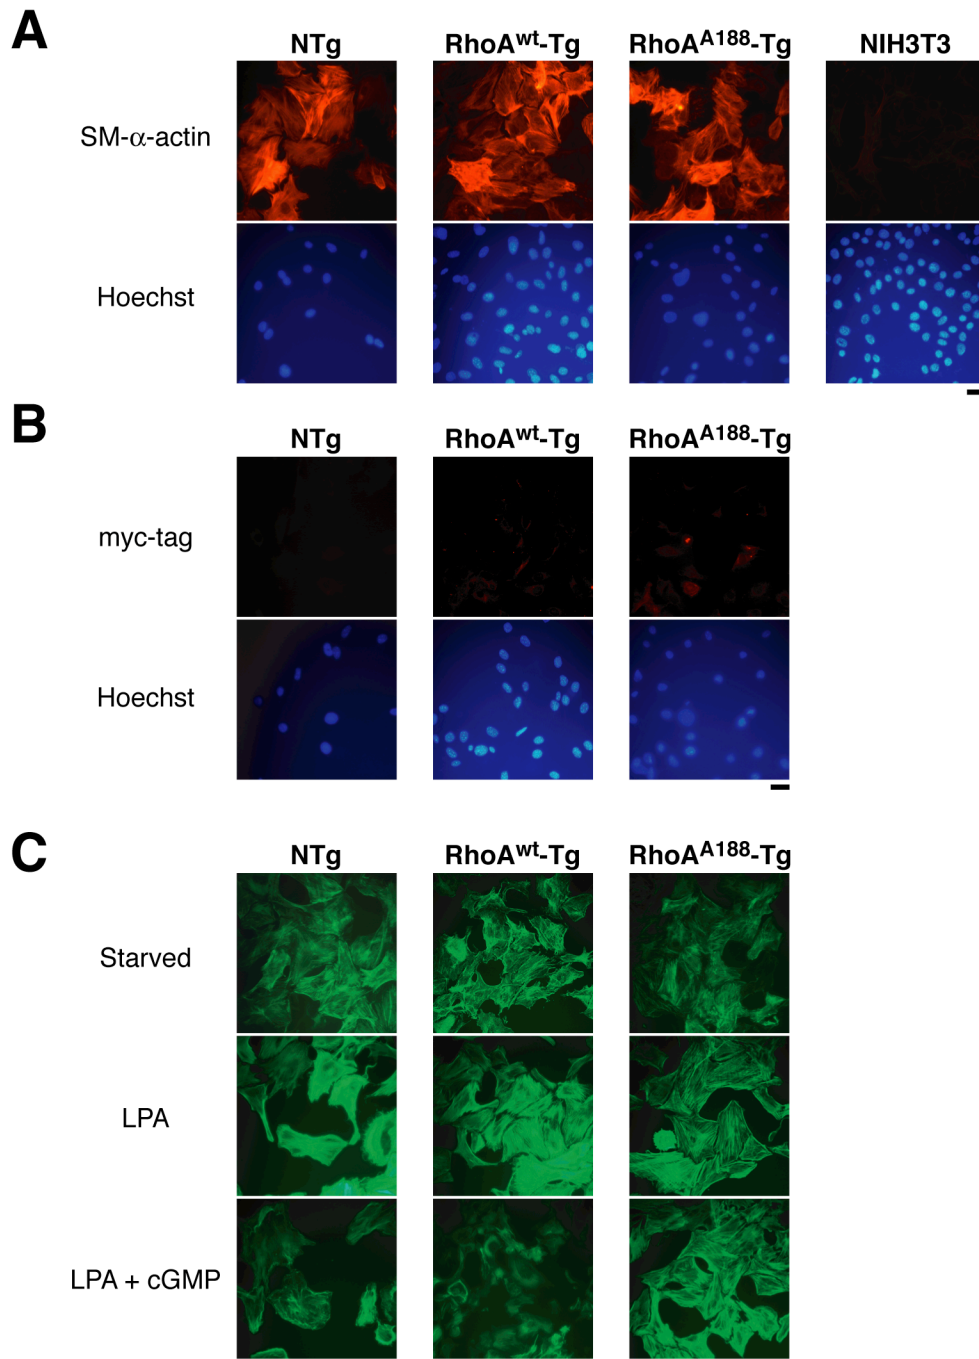

**Figure S6**
